# Supplementary material for: Electrodeposition of Ag nanosheet-assembled microsphere@Ag dendrite core–shell hierarchical architectures and their application in SERS
Source: Royal Society of Chemistry journal article supplement (doi:10.1039/c3ce41946k), 2014-01-01
Supplement: c3ce41946k.pdf [file c3ce41946k.pdf]

## Supporting Information

### Electrodeposition of Ag nanosheet-assembled microsphere @ Ag dendrites core-shell hierarchical architectures and their application in SERS

Xiaodan Li<sup>1</sup>, Meicheng Li<sup>1,2,\*</sup>, Peng Cui<sup>1</sup>, Xing Zhao<sup>1</sup>, Tiansheng, Gu<sup>1</sup> Hang Yu<sup>1</sup>, Yongjian Jiang<sup>1</sup> and Dandan Song<sup>1,2</sup>

<sup>1</sup> State Key Laboratory of Alternate Electrical Power System with Renewable Energy Sources, School of Renewable Energy, North China Electric Power University, Beijing 102206, China

<sup>2</sup> Suzhou Institute, North China Electric Power University, Suzhou 215123, China

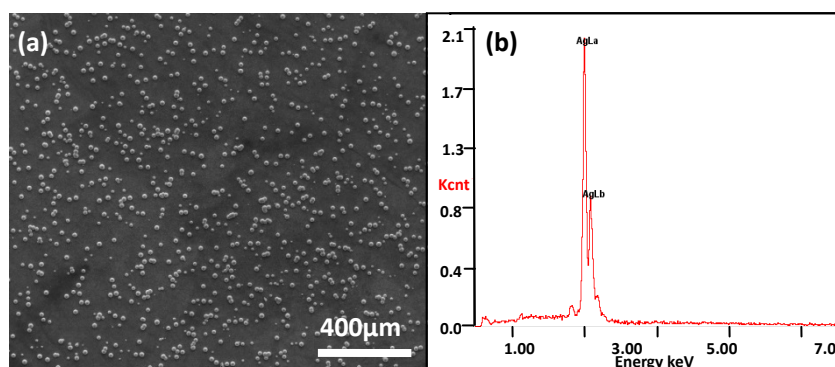

Fig. S1. (a) and (b) SEM image and EDX energy spectrum of the Ag core-shell hierarchical microstructures.

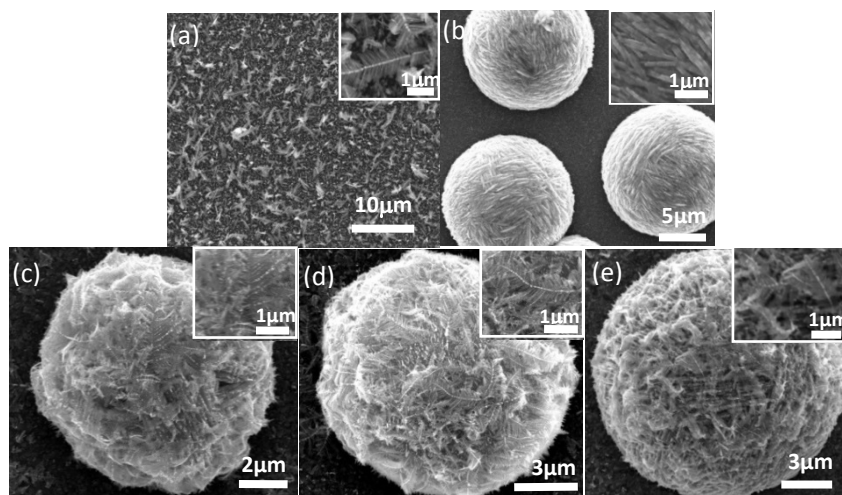

Fig. S2. SEM images of (a) silver dendritic structures; (b) Ag nanosheet-assembled microspheres; (c-e) Ag core-shell hierarchical microstructures deposited at 1.26 V, 1.11, 1.05V, respectively

#### Part S1 Estimation of enhancement factor

The SERS enhancement factor of the Ag core-shell hierarchical microstructure is estimated by calculating the ratios of the peak intensities of the SERS spectrum of R6G molecule on as-prepared sample (red curve in Fig. 5b) to the corresponding normal Raman spectrum of R6G molecule on FTO-coated glass (black curve in Fig. 5b):

$$EF = \frac{I_{SERS} / N_{SERS}}{I_{Ref} / N_{Ref}} \quad (1)$$

Where

$I_{SERS}$  is the peak intensity of the SERS spectrum,

$I_{Ref}$  is the peak intensity of normal Raman spectrum

$N_{SERS}$  is the number of R6G molecules illuminated by the laser on the as-prepared sample substrate

$N_{Ref}$  is the number of R6G molecules illuminated by the laser on the pure FTO-coated glass substrate

For the R6G film on the pure FTO-coated glass (1.5mm×1.8mm), the diameter of laser spot is 2μm, so the value of  $N_{Ref}$  was gotten as  $10^{-3} \times 2 \times 10^{-5} \times 6.02 \times 10^{23} \times \pi (2\mu\text{m}/2)^2 / (1.5 \times 1.8)\text{mm}^2 = 4.46 \times 10^9$ . In a similar way, the value of  $N_{SERS}$  was 44.6. For the band at  $612\text{cm}^{-1}$ ,  $I_{SERS}/I_{Ref}$  was 1.6. Therefore average enhancement factor for the band at  $612\text{cm}^{-1}$  is estimated to be  $1.6 \times 10^8$ . For other bands, the enhancement factor may be more than  $10^8$  because of higher value of  $I_{SERS}/I_{Ref}$ .

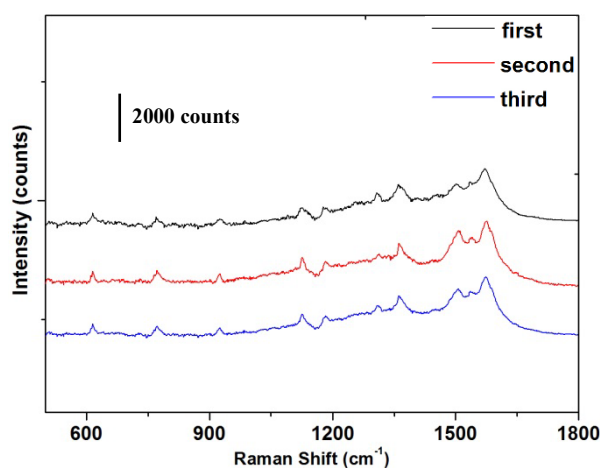

Fig. S3 Raman spectra of R6G (10-12 M) adsorbed on the samples treated by plasma cleaning
